# Supplementary material for: Multi-decadal ozone air quality and the role of temperature in Switzerland during summertime
Source: Copernicus journal article supplement (doi:10.5194/egusphere-2025-5883), 2025-12-05
Supplement: Supplementary file 1 [file egusphere-2025-5883-supplement.pdf]

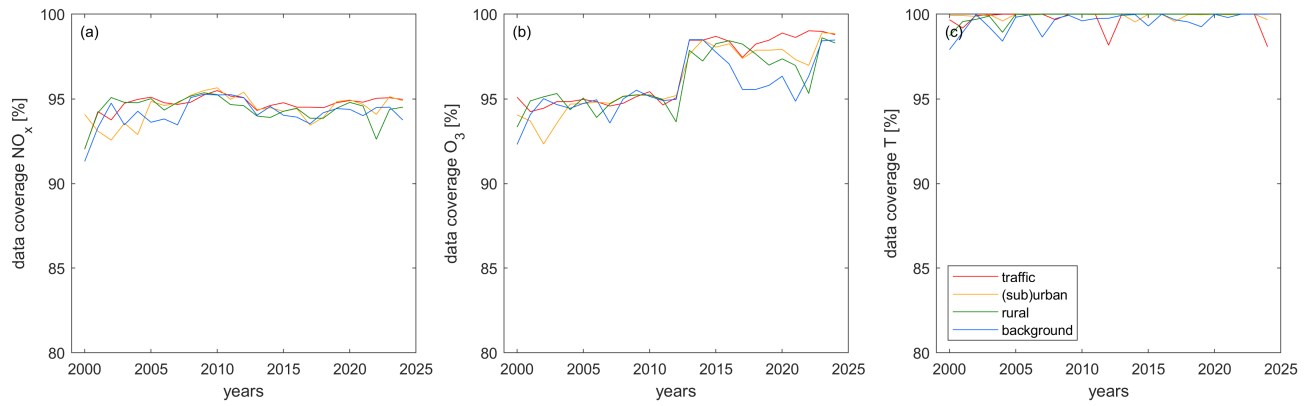

**Figure S1.** Data coverage over time for (a)  $\text{NO}_x$ , (b)  $\text{O}_3$  and (c) temperature at traffic (red), (sub)urban (orange), rural (green) and background (blue) sites. The traffic category contains data from two stations, rural and background from three and (sub)urban from four.

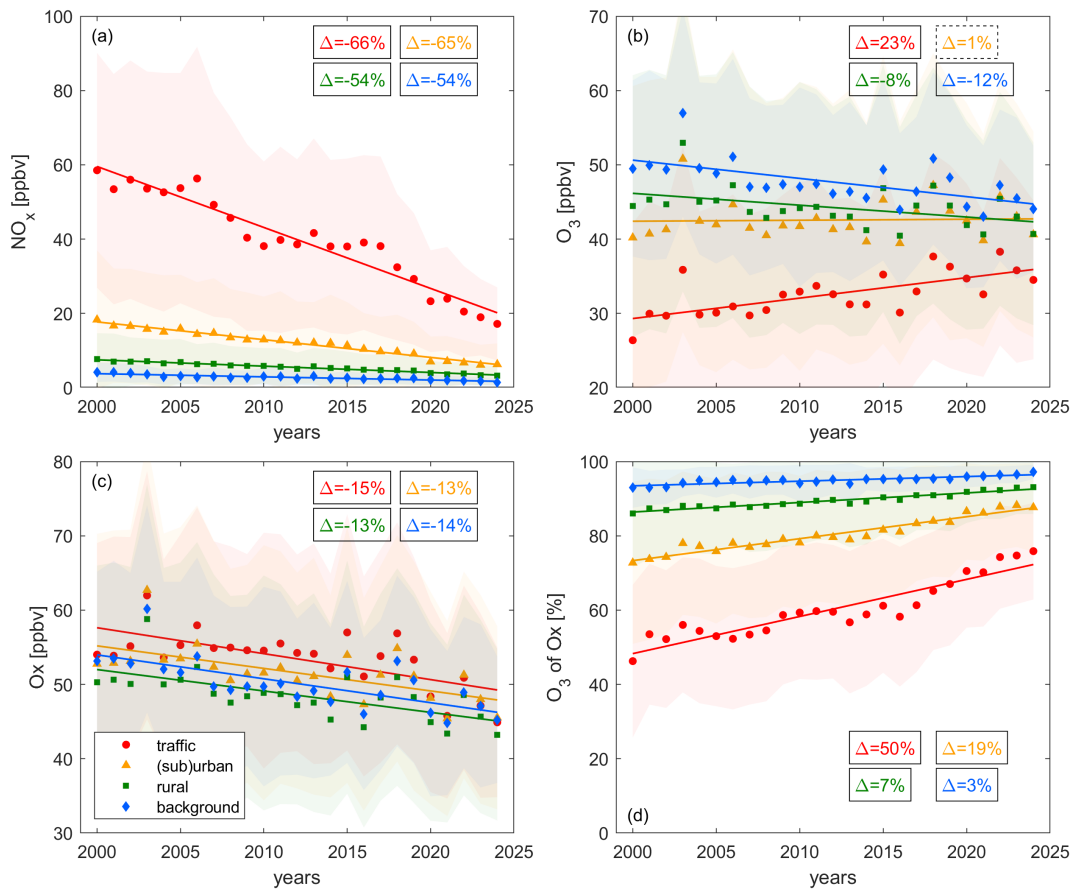

**Figure S2.** Same as Figure 3 of the manuscript, but including error bars, which represent the  $1\sigma$  standard deviation of the averaging.

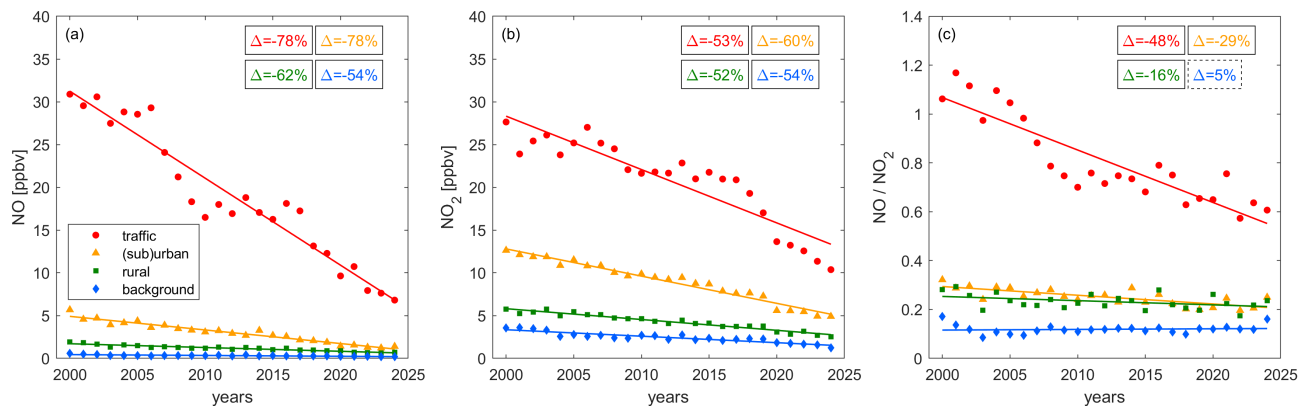

**Figure S3.** Decadal trends of (a) NO, (b) NO<sub>2</sub> and (c) the NO to NO<sub>2</sub> ratio at traffic (red), (sub)urban (orange), rural (green) and background (blue) sites. The boxes show the relative change of the trace gas levels between 2000 and 2024, whereby solid lines denote significant (p-value ≤ 0.05) and dashed lines insignificant (p-value > 0.05) trends.

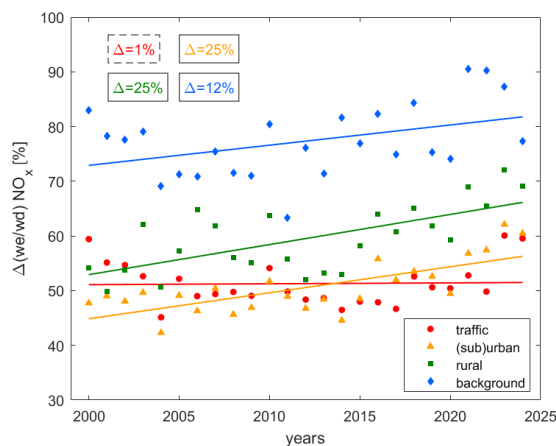

**Figure S4.** Decadal trends of the relative change between weekday and weekend NO<sub>x</sub> at traffic (red), (sub)urban (orange), rural (green) and background (blue) sites. The boxes show the relative change of the trace gas levels between 2000 and 2024, whereby solid lines denote significant (p-value ≤ 0.05) and dashed lines insignificant (p-value > 0.05) trends.

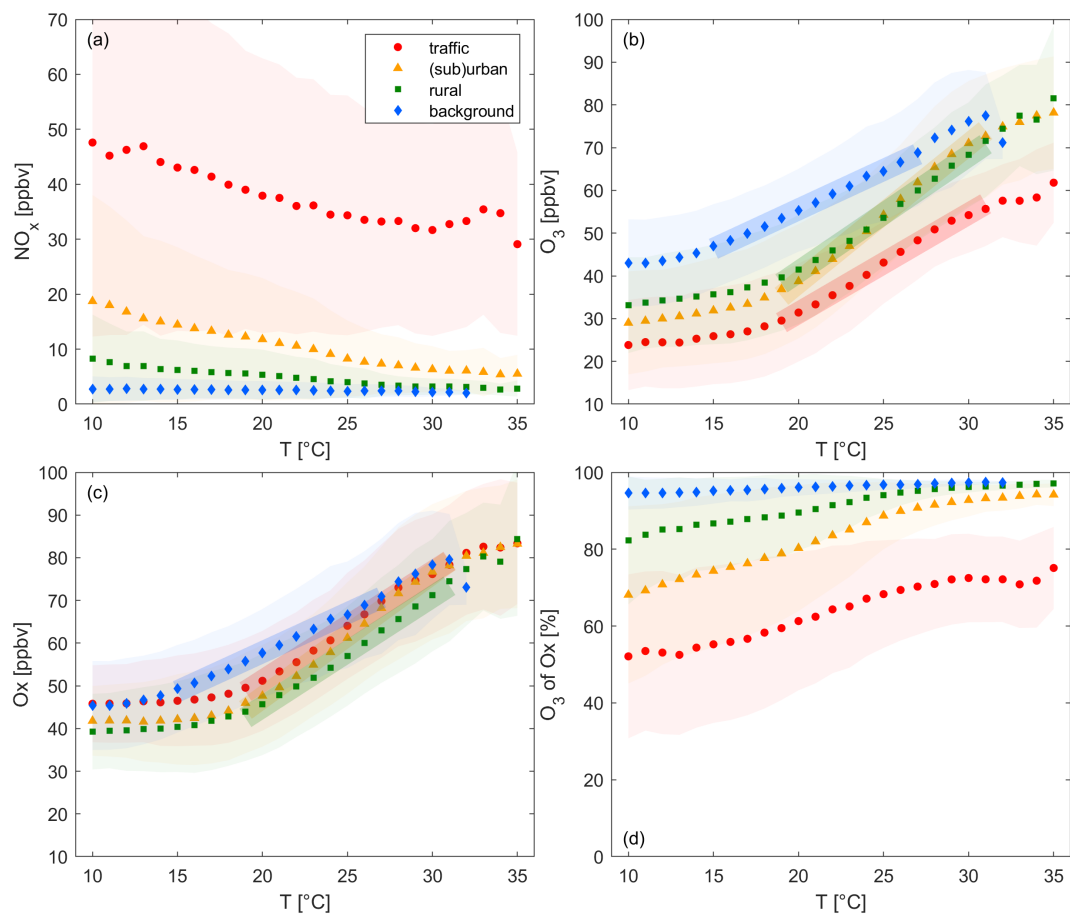

**Figure S5.** Same as Figure 6 of the manuscript, but including error bars, which represent the  $1\sigma$  standard deviation of the averaging.

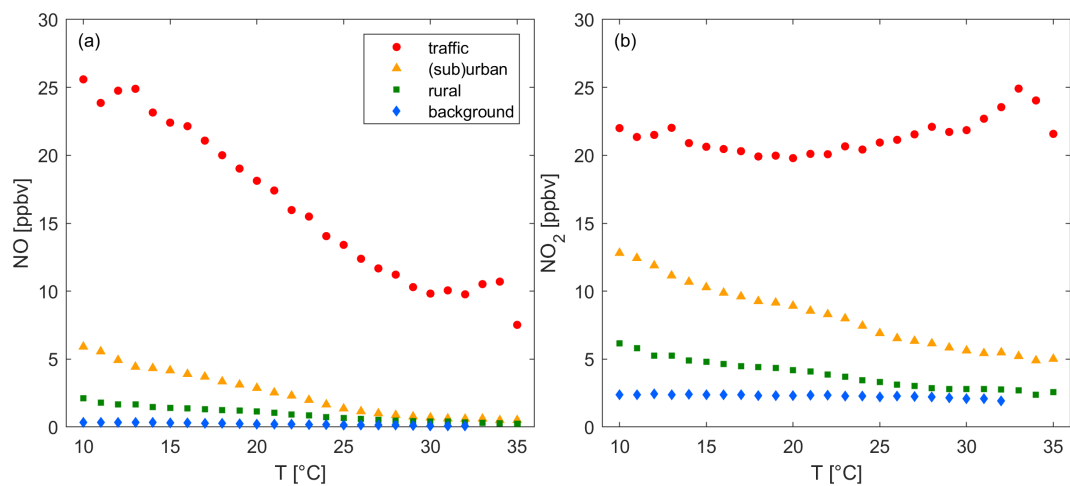

**Figure S6.** Changes of (a) NO and (b)  $\text{NO}_2$  with temperature at traffic (red), (sub)urban (orange), rural (green) and background (blue) sites.

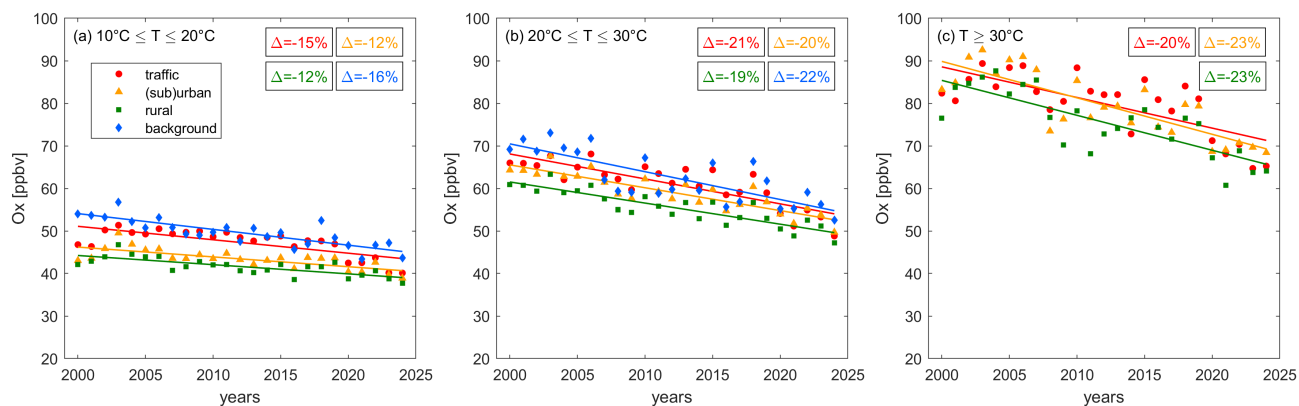

**Figure S7.** Same as Figure 8 of the manuscript, but for Ox.

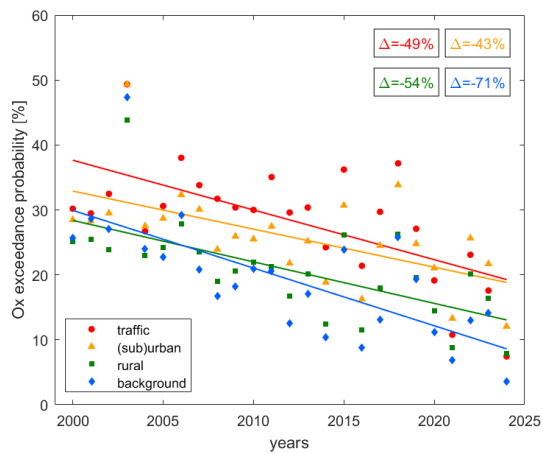

**Figure S8.** Same as Figure 9(a) of the manuscript, but for Ox.
